# Supplementary material for: Codon Usage for Genetic Diversity, and Evolutionary Dynamics of Novel Porcine Parvoviruses 2 through 7 (PPV2–PPV7)
Source: MDPI journal article supplement (doi:10.3390/v14020170), 2022-01-18
Supplement: s1 [file s1]

**Table S1. Reference strains information of PPV2.**

| Strsins      | GenBank accession NO. | Year | Area   |
|--------------|-----------------------|------|--------|
| BR/GO/ion-09 | KM926355.1            | 2011 | Brazil |
| US-135       | JX101461.1            | 2012 | USA    |
| US-523       | JX101462.1            | 2012 | USA    |
| 215          | KP245947.1            | 2015 | China  |
| GX-1-NS1     | MZ892964.1            | 2017 | China  |
| GX-15-NS1    | MZ892965.1            | 2017 | China  |
| GX-16-NS1    | MZ892966.1'           | 2017 | China  |
| GX-18-NS1    | MZ892967.1            | 2017 | China  |
| AH01-C1      | MK378157.1            | 2019 | China  |
| BJ01-C1      | MK378158.1            | 2019 | China  |
| CQ01-C1      | MK378159.1            | 2019 | China  |
| FJ01-C1      | MK378160.1            | 2019 | China  |
| GD01_C1      | MK378162.1            | 2019 | China  |
| GD02-C1      | MK378163.1            | 2019 | China  |
| GX04-C1      | MK378172.1            | 2019 | China  |
| GX03-C1      | MK378170.1            | 2019 | China  |
| GZ02-C1      | MK378179.1            | 2019 | China  |
| GZ03-C1      | MK378180.1            | 2019 | China  |
| HeB01-C1     | MK378183.1            | 2019 | China  |
| HeB03-C1     | MK378187.1            | 2019 | China  |
| HeB04-C1     | MK378188.1            | 2019 | China  |
| HeN01-C1     | MK378189.1            | 2019 | China  |
| HLJ01-C1     | MK378190.1            | 2019 | China  |
| HuN01-C1     | MK378195.1            | 2019 | China  |
| HuN02-C1     | MK378197.1            | 2019 | China  |
| JS01-C1      | MK378200.1            | 2019 | China  |
| JX01-C1      | MK378201.1            | 2019 | China  |
| LN02-C1      | MK378206.1            | 2019 | China  |
| NM01-C1      | MK378207.1            | 2019 | China  |
| NM02-C1      | MK378208.1            | 2019 | China  |
| NX01-C1      | MK378209.1            | 2019 | China  |
| NX02-C1      | MK378211.1            | 2019 | China  |
| SC02_C1      | MK378213.1            | 2019 | China  |
| SD01-C1      | MK378214.1            | 2019 | China  |
| SD02-C1      | MK378215.1            | 2019 | China  |
| SH01-C1      | MK378217.1            | 2019 | China  |
| SX01-C1      | MK378218.1            | 2019 | China  |
| SX02-C1      | MK378219.1            | 2019 | China  |

|                |            |      |       |
|----------------|------------|------|-------|
| TJ01-C1        | MK378220.1 | 2019 | China |
| ZJ01-C1        | MK378224.1 | 2019 | China |
| JX14           | MK092400.1 | 2020 | China |
| JX19           | MK092401.1 | 2020 | China |
| JX26           | MK092402.1 | 2020 | China |
| 180405-97-PPV2 | MH921914.1 | 2020 | Korea |
| MW051675.1     | P1-OK/USA  | 2021 | Korea |

---
