# Supplementary material for: Codon Usage for Genetic Diversity, and Evolutionary Dynamics of Novel Porcine Parvoviruses 2 through 7 (PPV2–PPV7)
Source: MDPI journal article supplement (doi:10.3390/v14020170), 2022-01-18
Supplement: s1 [file s1]

**Table S4. Reference strains information of PPV5.**

| Strains        | GenBank accession NO. | Year | Area   |
|----------------|-----------------------|------|--------|
| MI216          | JX896318.1            | 2011 | USA    |
| IN273          | JX896319.1            | 2011 | USA    |
| IA469          | JX896320.1            | 2011 | USA    |
| ND564          | JX896322.1            | 2011 | USA    |
| P13-9          | KX352455.1            | 2016 | Poland |
| P13-10         | KX352456.1            | 2016 | Poland |
| P12-1          | KX352457.1            | 2016 | Poland |
| K17-1          | KX352458.1            | 2016 | Poland |
| 171206-29-PPV5 | MH921904.1            | 2017 | Korea  |
| 171220-17-PPV5 | MH921908.1            | 2017 | Korea  |
| AH01           | MK378291.1            | 2017 | China  |
| BJ01           | MK378292.1            | 2017 | China  |
| CQ01           | MK378293.1            | 2017 | China  |
| FJ01           | MK378295.1            | 2017 | China  |
| GD02           | MK378298.1            | 2017 | China  |
| GZ01           | MK378305.1            | 2017 | China  |
| GZ03           | MK378307.1            | 2017 | China  |
| GZ04           | MK378308.1            | 2017 | China  |
| HeB01          | MK378309.1            | 2017 | China  |
| HeB03          | MK378312.1            | 2017 | China  |
| HuN01          | MK378325.1            | 2017 | China  |
| LN01           | MK378332.1            | 2017 | China  |
| NM02           | MK378336.1            | 2017 | China  |
| NX01           | MK378337.1            | 2017 | China  |
| NX02           | MK378338.1            | 2017 | China  |
| SD01           | MK378341.1            | 2017 | China  |
| SD02           | MK378342.1            | 2017 | China  |
| SX01           | MK378344.1            | 2017 | China  |
| TJ01           | MK378346.1            | 2017 | China  |
| YN01           | MK378347.1            | 2017 | China  |
| ZJ01           | MK378349.1            | 2017 | China  |
| 180119-23-PPV5 | MH921912.1            | 2018 | Korea  |
| PPV5-P2 OK/USA | MT671979.1            | 2018 | Brasil |
| P1_OK/USA      | MW051674.1            | 2018 | USA    |
| P2_OK/USA      | MW051673.1            | 2019 | USA    |
