# Supplementary material for: Codon Usage for Genetic Diversity, and Evolutionary Dynamics of Novel Porcine Parvoviruses 2 through 7 (PPV2–PPV7)
Source: MDPI journal article supplement (doi:10.3390/v14020170), 2022-01-18
Supplement: s1 [file s1]

**Table S2. Reference strains information of PPV3.**

| Strains      | GenBank accession NO. | Year | Area           |
|--------------|-----------------------|------|----------------|
| IA38835/1998 | KF561853.1            | 1998 | USA            |
| IA40895/1998 | KF561854.1            | 1998 | USA            |
| PPV3-03      | MK649762.1            | 2002 | United Kingdom |
| PPV3-02      | MK649763.1            | 2002 | United Kingdom |
| PPV3-01      | MK649761.1            | 2004 | United Kingdom |
| IIISRB       | KC701328.1            | 2007 | Serbia         |
| ISRB         | KC701332.1            | 2007 | Serbia         |
| IISRB        | KC701329.1            | 2008 | Serbia         |
| IVSRB        | KC701321.1            | 2008 | Serbia         |
| 302HU        | KC701327.1            | 2008 | Hungary        |
| 340HU        | KC701326.1            | 2008 | Hungary        |
| 359HU        | KC701325.1            | 2008 | Hungary        |
| 360HU        | KC701319.1            | 2008 | Hungary        |
| 643CRO       | KC701315.1            | 2008 | Croatia        |
| 655CRO       | KC701320.1            | 2008 | Croatia        |
| VISRB        | KC701330.1            | 2008 | Serbia         |
| 676CRO       | KC701323.1            | 2009 | Croatia        |
| 687CRO       | KC701318.1            | 2010 | Croatia        |
| 705CRO       | KC701317.1            | 2010 | Croatia        |
| MK649764.1   | 16                    | 2010 | United Kingdom |
| MK649765.1   | 17                    | 2010 | United Kingdom |
| MK649766.1   | 18                    | 2010 | United Kingdom |
| MK649767.1   | 19                    | 2010 | United Kingdom |
| MK649768.1   | 21                    | 2010 | United Kingdom |
| MK649769.1   | 22                    | 2010 | United Kingdom |
| 722CRO       | KC701322.1            | 2011 | Croatia        |
| 136PL        | KC701331.1            | 2011 | Poland         |
| VIIISRB      | KC701316.1            | 2011 | Serbia         |
| CQ01         | MK378226.1            | 2017 | China          |
| GX02         | MK378230.1            | 2017 | China          |
| GZ03         | MK378232.1            | 2017 | China          |
| GZ04         | MK378233.1            | 2017 | China          |
| HeN01        | MK378234.1            | 2017 | China          |
| LN02         | MK378238.1            | 2017 | China          |
| NX01         | MK378239.1            | 2017 | China          |
| NX02         | MK378240.1            | 2017 | China          |
| SH01         | MK378244.1            | 2017 | China          |
| E1           | MW030463.1            | 2018 | China          |

IZS-16

MH884552.1

2019

Italy
