# Supplementary material for: Codon Usage for Genetic Diversity, and Evolutionary Dynamics of Novel Porcine Parvoviruses 2 through 7 (PPV2–PPV7)
Source: MDPI journal article supplement (doi:10.3390/v14020170), 2022-01-18
Supplement: s1 [file s1]

## Supplementary Figure S2.

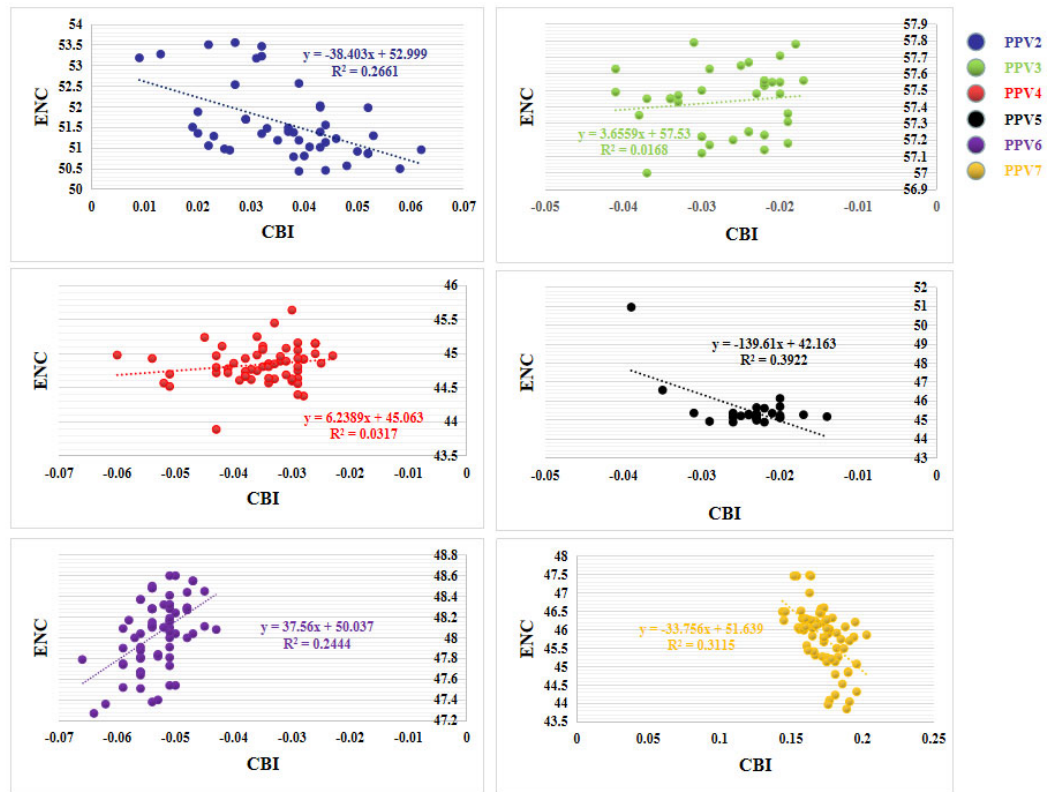

**Figure S2.** For the target host's own genes, CBI and ENC values have a good correlation, which more clearly reflects the expression of foreign genes in the target host.
