# Supplementary material for: Codon Usage for Genetic Diversity, and Evolutionary Dynamics of Novel Porcine Parvoviruses 2 through 7 (PPV2–PPV7)
Source: MDPI journal article supplement (doi:10.3390/v14020170), 2022-01-18
Supplement: s1 [file s1]

**Table S7.** Properties of structural protein genes from PPV strains relative synonymous codon usage analysis in this study (Black font RSCU>1.6, Black font underlined RSCU<0.6) (mean value  $\pm$  SD).

| Categories | PPV2                                | PPV3                                | PPV4                                | PPV5                                | PPV6                                | PPV7                                | ALL                                 |
|------------|-------------------------------------|-------------------------------------|-------------------------------------|-------------------------------------|-------------------------------------|-------------------------------------|-------------------------------------|
| TTT(Phe)   | 0.602 $\pm$ 0.052                   | 1.220 $\pm$ 0.015                   | 1.210 $\pm$ 0.022                   | 1.581 $\pm$ 0.016                   | 1.383 $\pm$ 0.013                   | <u>0.089 <math>\pm</math> 0.047</u> | 1.014 $\pm$ 0.559                   |
| TTC(Phe)   | 1.398 $\pm$ 0.052                   | 0.780 $\pm$ 0.015                   | 0.791 $\pm$ 0.022                   | <u>0.419 <math>\pm</math> 0.016</u> | 0.617 $\pm$ 0.013                   | 1.457 $\pm$ 0.047                   | 0.910 $\pm$ 0.423                   |
| TTA(Leu)   | <u>0.100 <math>\pm</math> 0.000</u> | 0.787 $\pm$ 0.107                   | <b>1.749 <math>\pm</math> 0.054</b> | <b>2.152 <math>\pm</math> 0.078</b> | <u>0.463 <math>\pm</math> 0.041</u> | <u>0.100 <math>\pm</math> 0.083</u> | 0.892 $\pm$ 0.869                   |
| TTG(Leu)   | 0.639 $\pm$ 0.044                   | 1.519 $\pm$ 0.062                   | 0.867 $\pm$ 0.107                   | 0.950 $\pm$ 0.067                   | <b>1.839 <math>\pm</math> 0.096</b> | <u>0.023 <math>\pm</math> 0.063</u> | 0.973 $\pm$ 0.644                   |
| CTT(Leu)   | 0.900 $\pm$ 0.118                   | 1.303 $\pm$ 0.067                   | 1.147 $\pm$ 0.076                   | 0.885 $\pm$ 0.028                   | 1.870 $\pm$ 0.100                   | <u>0.308 <math>\pm</math> 0.037</u> | 1.069 $\pm$ 0.519                   |
| CTC(Leu)   | <b>2.158 <math>\pm</math> 0.122</b> | 0.653 $\pm$ 0.053                   | <u>0.346 <math>\pm</math> 0.063</u> | <u>0.122 <math>\pm</math> 0.004</u> | 0.781 $\pm$ 0.099                   | 0.792 $\pm$ 0.120                   | 0.809 $\pm$ 0.712                   |
| CTA(Leu)   | <u>0.238 <math>\pm</math> 0.050</u> | <u>0.597 <math>\pm</math> 0.066</u> | 1.162 $\pm$ 0.063                   | 1.400 $\pm$ 0.077                   | <u>0.240 <math>\pm</math> 0.002</u> | 1.336 $\pm$ 0.235                   | 0.829 $\pm$ 0.537                   |
| CTG(Leu)   | <b>1.959 <math>\pm</math> 0.098</b> | 1.140 $\pm$ 0.035                   | 0.729 $\pm$ 0.057                   | <u>0.491 <math>\pm</math> 0.031</u> | 0.807 $\pm$ 0.082                   | <b>2.077 <math>\pm</math> 0.194</b> | 1.201 $\pm$ 0.668                   |
| ATT(Ile)   | 0.761 $\pm$ 0.126                   | 1.272 $\pm$ 0.043                   | 1.388 $\pm$ 0.030                   | <b>1.715 <math>\pm</math> 0.044</b> | <b>2.362 <math>\pm</math> 0.045</b> | <u>0.005 <math>\pm</math> 0.024</u> | 1.250 $\pm$ 0.808                   |
| ATC(Ile)   | 1.215 $\pm$ 0.173                   | 1.110 $\pm$ 0.047                   | <u>0.464 <math>\pm</math> 0.061</u> | <u>0.556 <math>\pm</math> 0.022</u> | <u>0.396 <math>\pm</math> 0.041</u> | <b>2.082 <math>\pm</math> 0.077</b> | 0.970 $\pm$ 0.644                   |
| ATA(Ile)   | 1.018 $\pm$ 0.101                   | 0.613 $\pm$ 0.013                   | 1.141 $\pm$ 0.064                   | 0.729 $\pm$ 0.043                   | <u>0.250 <math>\pm</math> 0.002</u> | <u>0.232 <math>\pm</math> 0.076</u> | 0.664 $\pm$ 0.379                   |
| GTT(Val)   | <u>0.411 <math>\pm</math> 0.105</u> | 1.153 $\pm$ 0.041                   | <b>2.002 <math>\pm</math> 0.103</b> | <b>1.969 <math>\pm</math> 0.091</b> | 1.056 $\pm$ 0.017                   | <u>0.160 <math>\pm</math> 0.024</u> | 1.125 $\pm$ 0.765                   |
| GTC(Val)   | 0.731 $\pm$ 0.123                   | 0.764 $\pm$ 0.056                   | <u>0.014 <math>\pm</math> 0.046</u> | <u>0.254 <math>\pm</math> 0.037</u> | <u>0.573 <math>\pm</math> 0.017</u> | 1.047 $\pm$ 0.102                   | <u>0.564 <math>\pm</math> 0.374</u> |
| GTA(Val)   | 1.138 $\pm$ 0.120                   | 0.906 $\pm$ 0.056                   | 0.945 $\pm$ 0.138                   | 0.996 $\pm$ 0.078                   | <u>0.240 <math>\pm</math> 0.000</u> | <u>0.269 <math>\pm</math> 0.088</u> | 0.749 $\pm$ 0.391                   |
| GTG(Val)   | <b>1.719 <math>\pm</math> 0.095</b> | 1.179 $\pm$ 0.039                   | 1.038 $\pm$ 0.177                   | 0.784 $\pm$ 0.055                   | <b>2.122 <math>\pm</math> 0.008</b> | <b>1.620 <math>\pm</math> 0.088</b> | 1.410 $\pm$ 0.496                   |
| TCT(Ser)   | 1.208 $\pm$ 0.082                   | <b>1.991 <math>\pm</math> 0.115</b> | <b>1.905 <math>\pm</math> 0.089</b> | 1.273 $\pm$ 0.091                   | <b>2.372 <math>\pm</math> 0.028</b> | <u>0.120 <math>\pm</math> 0.009</u> | 1.478 $\pm$ 0.800                   |
| TCC(Ser)   | 1.077 $\pm$ 0.051                   | 0.838 $\pm$ 0.079                   | 0.789 $\pm$ 0.091                   | <u>0.561 <math>\pm</math> 0.048</u> | 1.026 $\pm$ 0.023                   | 1.089 $\pm$ 0.067                   | 0.896 $\pm$ 0.207                   |
| TCA(Ser)   | <u>0.362 <math>\pm</math> 0.073</u> | 0.881 $\pm$ 0.059                   | 0.798 $\pm$ 0.064                   | <b>1.622 <math>\pm</math> 0.115</b> | <u>0.244 <math>\pm</math> 0.038</u> | 0.613 $\pm$ 0.122                   | 0.753 $\pm$ 0.491                   |
| TCG(Ser)   | 0.832 $\pm$ 0.162                   | <u>0.199 <math>\pm</math> 0.003</u> | <u>0.345 <math>\pm</math> 0.057</u> | <u>0.203 <math>\pm</math> 0.052</u> | <u>0.326 <math>\pm</math> 0.038</u> | <u>0.464 <math>\pm</math> 0.147</u> | <u>0.395 <math>\pm</math> 0.236</u> |
| AGT(Ser)   | <u>0.506 <math>\pm</math> 0.070</u> | 1.596 $\pm$ 0.025                   | 0.813 $\pm$ 0.055                   | 0.997 $\pm$ 0.072                   | <b>1.812 <math>\pm</math> 0.008</b> | <u>0.296 <math>\pm</math> 0.125</u> | 1.003 $\pm$ 0.598                   |
| AGC(Ser)   | <b>2.015 <math>\pm</math> 0.094</b> | <u>0.494 <math>\pm</math> 0.007</u> | 1.349 $\pm$ 0.073                   | 1.337 $\pm$ 0.020                   | <u>0.230 <math>\pm</math> 0.000</u> | <b>2.053 <math>\pm</math> 0.172</b> | 1.247 $\pm$ 0.756                   |

|          |                             |                             |                             |                             |                             |                             |                             |
|----------|-----------------------------|-----------------------------|-----------------------------|-----------------------------|-----------------------------|-----------------------------|-----------------------------|
| CCT(Pro) | 0.707 ± 0.067               | 1.427 ± 0.028               | 1.154 ± 0.041               | <b>2.027 ± 0.062</b>        | <b>2.516 ± 0.027</b>        | <b><u>0.425 ± 0.060</u></b> | 1.376 ± 0.791               |
| CCC(Pro) | <b>1.905 ± 0.039</b>        | 1.043 ± 0.020               | <b><u>0.196 ± 0.036</u></b> | <b><u>0.115 ± 0.005</u></b> | 0.630 ± 0.023               | 0.688 ± 0.074               | 0.763 ± 0.655               |
| CCA(Pro) | <b><u>0.564 ± 0.099</u></b> | 0.798 ± 0.029               | <b>2.020 ± 0.082</b>        | 1.371 ± 0.069               | 0.630 ± 0.002               | 0.978 ± 0.199               | 1.060 ± 0.552               |
| CCG(Pro) | 0.822 ± 0.142               | 0.722 ± 0.029               | 0.633 ± 0.110               | <b><u>0.487 ± 0.078</u></b> | <b><u>0.233 ± 0.023</u></b> | 0.998 ± 0.231               | 0.649 ± 0.267               |
| ACT(Thr) | 0.643 ± 0.072               | 1.292 ± 0.031               | 0.871 ± 0.079               | 0.679 ± 0.021               | <b>1.615 ± 0.025</b>        | <b><u>0.384 ± 0.078</u></b> | 0.914 ± 0.457               |
| ACC(Thr) | <b>1.755 ± 0.094</b>        | 1.121 ± 0.058               | 0.629 ± 0.041               | 0.680 ± 0.044               | 1.120 ± 0.038               | 0.875 ± 0.145               | 1.030 ± 0.412               |
| ACA(Thr) | <b><u>0.460 ± 0.114</u></b> | 1.079 ± 0.118               | <b>2.170 ± 0.089</b>        | <b>2.247 ± 0.053</b>        | <b><u>0.390 ± 0.035</u></b> | 0.839 ± 0.249               | 1.198 ± 0.823               |
| ACG(Thr) | 1.142 ± 0.111               | <b><u>0.503 ± 0.068</u></b> | <b><u>0.329 ± 0.061</u></b> | <b><u>0.401 ± 0.007</u></b> | 0.874 ± 0.027               | 0.990 ± 0.302               | 0.707 ± 0.339               |
| GCT(Ala) | 1.150 ± 0.059               | <b>1.640 ± 0.083</b>        | <b>1.840 ± 0.106</b>        | <b>1.929 ± 0.085</b>        | <b>2.304 ± 0.067</b>        | 0.670 ± 0.076               | 1.589 ± 0.588               |
| GCC(Ala) | 1.545 ± 0.084               | 1.063 ± 0.107               | <b><u>0.135 ± 0.047</u></b> | <b><u>0.408 ± 0.035</u></b> | 0.723 ± 0.046               | 0.958 ± 0.114               | 0.805 ± 0.500               |
| GCA(Ala) | 0.831 ± 0.068               | <b><u>0.470 ± 0.040</u></b> | <b>1.770 ± 0.068</b>        | 1.215 ± 0.036               | <b><u>0.422 ± 0.026</u></b> | 0.697 ± 0.117               | 0.901 ± 0.513               |
| GCG(Ala) | <b><u>0.469 ± 0.078</u></b> | 0.820 ± 0.054               | <b><u>0.256 ± 0.089</u></b> | <b><u>0.448 ± 0.087</u></b> | <b><u>0.557 ± 0.052</u></b> | 0.766 ± 0.129               | <b><u>0.553 ± 0.211</u></b> |
| TAT(Tyr) | <b><u>0.293 ± 0.077</u></b> | 1.040 ± 0.030               | 1.305 ± 0.050               | 1.274 ± 0.035               | 1.059 ± 0.033               | <b><u>0.386 ± 0.033</u></b> | 0.893 ± 0.443               |
| TAC(Tyr) | <b>1.707 ± 0.077</b>        | 0.960 ± 0.030               | 0.695 ± 0.050               | 0.726 ± 0.035               | 0.941 ± 0.033               | 1.160 ± 0.033               | 1.031 ± 0.372               |
| CAT(His) | 0.669 ± 0.084               | 1.404 ± 0.031               | 1.055 ± 0.048               | 1.198 ± 0.031               | <b>1.626 ± 0.048</b>        | <b><u>0.533 ± 0.070</u></b> | 1.081 ± 0.421               |
| CAC(His) | 1.331 ± 0.084               | <b><u>0.596 ± 0.031</u></b> | 0.945 ± 0.048               | 0.802 ± 0.031               | <b><u>0.374 ± 0.048</u></b> | 1.013 ± 0.070               | 0.843 ± 0.335               |
| CAA(Gln) | 0.813 ± 0.027               | 0.801 ± 0.037               | 0.968 ± 0.033               | 1.501 ± 0.029               | 1.024 ± 0.062               | 0.792 ± 0.069               | 0.983 ± 0.271               |
| CAG(Gln) | 1.187 ± 0.027               | 1.199 ± 0.037               | 1.032 ± 0.033               | <b><u>0.499 ± 0.029</u></b> | 0.976 ± 0.062               | 0.754 ± 0.069               | 0.941 ± 0.271               |
| AAT(Asn) | 0.789 ± 0.079               | 1.167 ± 0.022               | 1.115 ± 0.019               | 1.241 ± 0.016               | 1.594 ± 0.034               | <b><u>0.095 ± 0.044</u></b> | 1.000 ± 0.513               |
| AAC(Asn) | 1.211 ± 0.079               | 0.833 ± 0.022               | 0.885 ± 0.019               | 0.759 ± 0.016               | <b><u>0.406 ± 0.034</u></b> | 1.450 ± 0.044               | 0.924 ± 0.365               |
| AAA(Lys) | <b><u>0.485 ± 0.053</u></b> | 1.353 ± 0.033               | <b>1.882 ± 0.046</b>        | <b>1.814 ± 0.016</b>        | 1.160 ± 0.000               | 1.081 ± 0.138               | 1.296 ± 0.517               |
| AAG(Lys) | 1.515 ± 0.053               | 0.647 ± 0.033               | <b><u>0.118 ± 0.046</u></b> | <b><u>0.186 ± 0.016</u></b> | 0.840 ± 0.000               | <b><u>0.465 ± 0.138</u></b> | 0.628 ± 0.513               |
| GAT(Asp) | <b><u>0.339 ± 0.035</u></b> | 1.423 ± 0.035               | 1.429 ± 0.038               | 1.092 ± 0.020               | 1.302 ± 0.027               | <b><u>0.524 ± 0.045</u></b> | 1.018 ± 0.474               |
| GAC(Asp) | <b>1.661 ± 0.035</b>        | <b><u>0.577 ± 0.035</u></b> | <b><u>0.571 ± 0.038</u></b> | 0.908 ± 0.020               | 0.698 ± 0.027               | 1.022 ± 0.045               | 0.906 ± 0.412               |

|          |                             |                             |                             |                             |                             |                             |                             |
|----------|-----------------------------|-----------------------------|-----------------------------|-----------------------------|-----------------------------|-----------------------------|-----------------------------|
| GAA(Glu) | <b><u>0.407 ± 0.031</u></b> | 0.667 ± 0.020               | 1.533 ± 0.057               | 1.597 ± 0.014               | 0.836 ± 0.013               | 0.660 ± 0.053               | 0.950 ± 0.496               |
| GAG(Glu) | 1.593 ± 0.031               | 1.333 ± 0.020               | <b><u>0.467 ± 0.057</u></b> | <b><u>0.403 ± 0.014</u></b> | 1.164 ± 0.013               | 0.886 ± 0.053               | 0.975 ± 0.477               |
| TGT(Cys) | <b><u>0.328 ± 0.006</u></b> | 1.330 ± 0.000               | 1.191 ± 0.052               | 1.286 ± 0.015               | 1.422 ± 0.055               | <b><u>0.220 ± 0.013</u></b> | 0.963 ± 0.540               |
| TGC(Cys) | <b><u>1.672 ± 0.006</u></b> | 0.670 ± 0.000               | 0.810 ± 0.052               | 0.714 ± 0.015               | <b><u>0.578 ± 0.055</u></b> | 1.326 ± 0.013               | 0.961 ± 0.437               |
| CGT(Arg) | <b><u>0.488 ± 0.071</u></b> | <b><u>0.536 ± 0.049</u></b> | <b><u>0.295 ± 0.007</u></b> | <b><u>0.015 ± 0.059</u></b> | 1.177 ± 0.055               | <b><u>0.123 ± 0.036</u></b> | <b><u>0.439 ± 0.414</u></b> |
| CGC(Arg) | 0.620 ± 0.085               | 1.436 ± 0.032               | <b><u>0.153 ± 0.023</u></b> | 1.160 ± 0.021               | 1.342 ± 0.071               | 1.244 ± 0.077               | 0.992 ± 0.501               |
| CGA(Arg) | <b><u>0.586 ± 0.110</u></b> | <b><u>0.443 ± 0.005</u></b> | <b><u>0.298 ± 0.024</u></b> | <b><u>0.510 ± 0.128</u></b> | <b><u>0.390 ± 0.000</u></b> | 0.942 ± 0.126               | <b><u>0.528 ± 0.225</u></b> |
| CGG(Arg) | 0.816 ± 0.094               | 1.448 ± 0.018               | <b><u>0.153 ± 0.023</u></b> | <b><u>0.263 ± 0.080</u></b> | 0.770 ± 0.059               | <b><u>0.419 ± 0.114</u></b> | 0.645 ± 0.475               |
| AGA(Arg) | 1.471 ± 0.119               | 1.127 ± 0.029               | <b><u>4.097 ± 0.129</u></b> | <b><u>3.812 ± 0.107</u></b> | 1.550 ± 0.000               | <b><u>1.615 ± 0.159</u></b> | <b><u>2.279 ± 1.312</u></b> |
| AGG(Arg) | <b><u>2.021 ± 0.164</u></b> | 1.004 ± 0.013               | 1.006 ± 0.130               | <b><u>0.232 ± 0.004</u></b> | 0.762 ± 0.040               | <b><u>0.292 ± 0.138</u></b> | 0.886 ± 0.650               |
| GGT(Gly) | 0.782 ± 0.069               | 1.192 ± 0.026               | 1.108 ± 0.080               | 1.137 ± 0.027               | 1.439 ± 0.066               | <b><u>0.354 ± 0.051</u></b> | 1.002 ± 0.381               |
| GGC(Gly) | 1.306 ± 0.069               | 0.826 ± 0.050               | <b><u>0.161 ± 0.049</u></b> | <b><u>0.410 ± 0.008</u></b> | 0.678 ± 0.074               | 0.976 ± 0.076               | 0.726 ± 0.408               |
| GGA(Gly) | 0.976 ± 0.051               | 0.648 ± 0.026               | <b><u>2.004 ± 0.070</u></b> | <b><u>1.834 ± 0.047</u></b> | <b><u>0.396 ± 0.021</u></b> | 1.128 ± 0.073               | 1.164 ± 0.640               |
| GGG(Gly) | 0.938 ± 0.053               | 1.334 ± 0.028               | 0.728 ± 0.080               | 0.623 ± 0.043               | 1.487 ± 0.055               | 0.634 ± 0.062               | 0.957 ± 0.372               |
