# Supplementary material for: Codon Usage for Genetic Diversity, and Evolutionary Dynamics of Novel Porcine Parvoviruses 2 through 7 (PPV2–PPV7)
Source: MDPI journal article supplement (doi:10.3390/v14020170), 2022-01-18
Supplement: s1 [file s1]

**Table S3. Reference strains information of PPV4.**

| Strsins              | GenBank accession NO. | Year | Area           |
|----------------------|-----------------------|------|----------------|
| PPV4-01              | MK609918.1            | 2002 | United Kingdom |
| VIIISRB              | KC701338.1            | 2006 | Serbia         |
| 296HU                | KC701339.1            | 2007 | Hungary        |
| 40HU                 | KC701341.1            | 2007 | Hungary        |
| 285HU                | KC701342.1            | 2007 | Hungary        |
| 263HU                | KC701349.1            | 2007 | Hungary        |
| III32SRB             | KC701351.1            | 2007 | Serbia         |
| VSRB                 | KC701353.1            | 2007 | Serbia         |
| IISRB                | KC701354.1            | 2007 | Serbia         |
| 317HU                | KC701340.1            | 2008 | Hungary        |
| 299HU                | KC701343.1            | 2008 | Hungary        |
| 654CRO               | KC701344.1            | 2008 | Croatia        |
| IVSRB                | KC701345.1            | 2008 | Serbia         |
| S-145-2HU            | KC701346.1            | 2008 | Hungary        |
| PPV4.complete genome | KY586146.1            | 2008 | Brazil         |
| HEN0922-5400         | GU978964.1            | 2009 | China          |
| HEN0922-5645         | GU978965.1            | 2009 | China          |
| JS0918-5598          | GU978966.2            | 2009 | China          |
| JS0910-5644          | GU978967.1            | 2009 | China          |
| JS0910-5400          | GU978968.1            | 2009 | China          |
| JS0918a              | HM031134.1            | 2009 | China          |
| JS0918b              | HM031135.1            | 2009 | China          |
| 66PL                 | KC701333.1            | 2011 | Poland         |
| 97PL                 | KC701334.1            | 2011 | Poland         |
| 107PL                | KC701335.1            | 2011 | Poland         |
| 150PL                | KC701336.1            | 2011 | Poland         |
| 85G12PL              | KC701337.1            | 2011 | Poland         |
| 33PL                 | KC701347.1            | 2011 | Poland         |
| 21SRB                | KC701348.1            | 2011 | Serbia         |
| 185PL                | KC701350.1            | 2011 | Poland         |
| 21PL                 | KC701352.1            | 2011 | Poland         |
| 99PL                 | KC701355.1            | 2011 | Poland         |
| JX15                 | MK092418.1            | 2015 | China          |
| JX28                 | MK092419.1            | 2015 | China          |
| JX24                 | MK092420.1            | 2015 | China          |
| HB3                  | KP245953.1            | 2017 | China          |
| 171206-10-PPV4       | MH921902.1            | 2017 | Korea          |
| CQ01                 | MK378247.1            | 2017 | China          |

|                     |            |      |         |
|---------------------|------------|------|---------|
| GD01                | MK378249.1 | 2017 | China   |
| GX05                | MK378255.1 | 2017 | China   |
| GZ02                | MK378257.1 | 2017 | China   |
| HeB01               | MK378260.1 | 2017 | China   |
| HeB03               | MK378262.1 | 2017 | China   |
| HeB04               | MK378263.1 | 2017 | China   |
| HeN01               | MK378264.1 | 2017 | China   |
| HuN01               | MK378268.1 | 2017 | China   |
| HuN02               | MK378269.1 | 2017 | China   |
| JL01                | MK378270.1 | 2017 | China   |
| LN01                | MK378273.1 | 2017 | China   |
| NM02                | MK378276.1 | 2017 | China   |
| NX02                | MK378278.1 | 2017 | China   |
| SX01                | MK378286.1 | 2017 | China   |
| 180119-2-PPV4       | MH921910.1 | 2018 | Korea   |
| 180119-23-PPV4      | MH921911.1 | 2018 | Korea   |
| 180605-30-PPV4      | MH921915.1 | 2018 | Korea   |
| MK649769.1P1_OK/USA | MW073110.1 | 2018 | USA     |
| QNi17               | MT434667.1 | 2019 | Vietnam |
| QT02                | MT434668.1 | 2019 | Vietnam |
| QT20                | MT434669.1 | 2019 | Vietnam |
