# Supplementary material for: Codon Usage for Genetic Diversity, and Evolutionary Dynamics of Novel Porcine Parvoviruses 2 through 7 (PPV2–PPV7)
Source: MDPI journal article supplement (doi:10.3390/v14020170), 2022-01-18
Supplement: s1 [file s1]

**Table S5. Reference strains information of PPV6.**

| Strains        | GenBank accession NO. | Year | Area  |
|----------------|-----------------------|------|-------|
| BJ             | KF999681.1            | 2013 | China |
| BJ2            | KF999682.1            | 2013 | China |
| JS             | KF999683.1            | 2013 | China |
| SC             | KF999684.1            | 2013 | China |
| TJ             | NC_023860.1           | 2013 | China |
| TJ             | KF999685.1            | 2013 | China |
| GX-1           | MZ846220.1            | 2017 | China |
| GX-15          | MZ846221.1            | 2017 | China |
| GX-30          | MZ846219.1            | 2017 | China |
| GX-65          | MZ846222.1            | 2017 | China |
| 170403-49-PPV6 | MH921900.1            | 2018 | Korea |
| 70405-1-PPV6   | MH921901.1            | 2018 | Korea |
| 171206-11-PPV6 | MH921903.1            | 2018 | Korea |
| 171219-40-PPV6 | MH921906.1            | 2018 | Korea |
| 171220-11-PPV6 | MH921907.1            | 2018 | Korea |
| 171220-44-PPV6 | MH921909.1            | 2018 | Korea |
| 180119-25-PPV6 | MH921913.1            | 2018 | Korea |
| AH01           | MK378350.1            | 2018 | China |
| BJ01           | MK378351.1            | 2018 | China |
| CQ01           | MK378352.1            | 2018 | China |
| GD02           | MK378355.1            | 2018 | China |
| GD03           | MK378356.1            | 2018 | China |
| GX03           | MK378360.1            | 2018 | China |
| GX04           | MK378361.1            | 2018 | China |
| GZ01           | MK378364.1            | 2018 | China |
| GZ02           | MK378365.1            | 2018 | China |
| GZ03           | MK378366.1            | 2018 | China |
| GZ04           | MK378367.1            | 2018 | China |
| HeB01          | MK378368.1            | 2018 | China |
| HeB02          | MK378369.1            | 2018 | China |
| HeB04          | MK378371.1            | 2018 | China |
| HeN01          | MK378372.1            | 2018 | China |
| HLJ01          | MK378373.1            | 2018 | China |
| HuB01          | MK378374.1            | 2018 | China |
| HuN01          | MK378376.1            | 2018 | China |
| HuN02          | MK378377.1            | 2018 | China |
| JX01           | MK378381.1            | 2018 | China |
| JX01           | MK378382.1            | 2018 | China |

|             |            |      |       |
|-------------|------------|------|-------|
| LN02        | MK378386.1 | 2018 | China |
| NM01        | MK378387.1 | 2018 | China |
| NM02        | MK378388.1 | 2018 | China |
| NX01        | MK378389.1 | 2018 | China |
| NX02        | MK378390.1 | 2018 | China |
| SC02        | MK378392.1 | 2018 | China |
| SD01        | MK378393.1 | 2018 | China |
| SH01        | MK378396.1 | 2018 | China |
| SX01        | MK378397.1 | 2018 | China |
| SX02        | MK378399.1 | 2018 | China |
| TJ01        | MK378400.1 | 2018 | China |
| YN01        | MK378401.1 | 2018 | China |
| ZJ01        | MK378405.1 | 2018 | China |
| DSH14       | MK092469.1 | 2018 | China |
| DSH25       | MK092470.1 | 2018 | China |
| DSH27       | MK092462.1 | 2018 | China |
| JX15        | MK092471.1 | 2018 | China |
| JX19        | MK092463.1 | 2018 | China |
| JX20        | MK092472.1 | 2018 | China |
| JX25        | MK092464.1 | 2018 | China |
| JX26        | MK092465.1 | 2018 | China |
| JX30        | MK092466.1 | 2018 | China |
| JX33        | MK092467.1 | 2018 | China |
| JX37        | MK092473.1 | 2018 | China |
| JX38        | MK092474.1 | 2018 | China |
| KA1(1925)   | MH447541.1 | 2018 | Korea |
| KF1(PPV6-1) | MH447535.1 | 2018 | Korea |
| KF2(2044)   | MH447536.1 | 2018 | Korea |
| KF3(2011)   | MH447537.1 | 2018 | Korea |
| KF4(1940)   | MH447538.1 | 2018 | Korea |
| KF5(405)    | MH447539.1 | 2018 | Korea |
| KF6(403)    | MH447540.1 | 2018 | Korea |
| FJ2017      | MG760726.1 | 2018 | China |
| P1_OK/USA   | MW051672.1 | 2020 | USA   |
