# Supplementary material for: Codon Usage for Genetic Diversity, and Evolutionary Dynamics of Novel Porcine Parvoviruses 2 through 7 (PPV2–PPV7)
Source: MDPI journal article supplement (doi:10.3390/v14020170), 2022-01-18
Supplement: s1 [file s1]

**Table S6. Reference strains information of PPV7.**

| Strains                            | GenBank accession NO. | Year | Area           |
|------------------------------------|-----------------------|------|----------------|
| 42-NS1 (REP) and capsid (CP) genes | KU563733.1            | 2016 | USA            |
| GX-1                               | MZ846209.1            | 2017 | China          |
| GX-6                               | MZ846210.1            | 2017 | China          |
| GX-14                              | MZ846211.1            | 2017 | China          |
| GX-15                              | MZ846212.1            | 2017 | China          |
| GX-30                              | MZ846213.1            | 2017 | China          |
| GD-2014-2                          | KY996757.1            | 2017 | United Kingdom |
| GD-2014-3                          | KY996758.1            | 2017 | United Kingdom |
| GX2                                | MG543456.1            | 2017 | China          |
| GX3                                | MG543457.1            | 2017 | China          |
| GX5                                | MG543458.1            | 2017 | China          |
| GX6                                | MG543459.1            | 2017 | China          |
| GX28                               | MG543460.1            | 2017 | China          |
| GX29                               | MG543461.1            | 2017 | China          |
| GX30                               | MG543462.1            | 2017 | China          |
| GX31                               | MG543463.1            | 2017 | China          |
| GX32                               | MG543464.1            | 2017 | China          |
| GX34                               | MG543465.1            | 2017 | China          |
| GX35                               | MG543466.1            | 2017 | China          |
| GX44                               | MG543467.1            | 2017 | China          |
| GX45                               | MG543468.1            | 2017 | China          |
| GX47                               | MG543470.1            | 2017 | China          |
| GX48                               | MG543469.1            | 2017 | China          |
| GX49                               | MG543471.1            | 2017 | China          |
| GX50                               | MG543472.1            | 2017 | China          |
| FJFZ2017                           | MG696111.1            | 2017 | China          |
| FJLY2017                           | MG696112.1            | 2017 | China          |
| JL-5                               | MZ846217.1            | 2018 | China          |
| JL-13                              | MZ846218.1            | 2018 | China          |
| JL-71                              | MZ846223.1            | 2018 | China          |
| SWE2                               | MG914435.1            | 2018 | China          |
| GZ02                               | MK378411.1            | 2018 | China          |
| PPV7-55                            | MK092477.1            | 2018 | China          |
| PPV7-60                            | MK092478.1            | 2018 | China          |
| PPV7-77                            | MK092479.1            | 2018 | China          |
| PPV7-80                            | MK092480.1            | 2018 | China          |
| PPV7-87-clone1                     | MK092481.1            | 2018 | China          |

|                           |            |      |          |
|---------------------------|------------|------|----------|
| PPV7-87-clone2            | MK092482.1 | 2018 | China    |
| DJH11                     | MK092484.1 | 2018 | China    |
| DJH12                     | MK092485.1 | 2018 | China    |
| DJH13                     | MK092486.1 | 2018 | China    |
| DJH14                     | MK092487.1 | 2018 | China    |
| DJH19                     | MK092488.1 | 2018 | China    |
| DJH20                     | MK092489.1 | 2018 | China    |
| DJH23                     | MK092490.1 | 2018 | China    |
| DJH24                     | MK092491.1 | 2018 | China    |
| DJH26                     | MK092492.1 | 2018 | China    |
| JX10                      | MK092493.1 | 2018 | China    |
| JX15                      | MK092494.1 | 2018 | China    |
| JX21                      | MK092495.1 | 2018 | China    |
| JX38                      | MK092496.1 | 2018 | China    |
| KF1                       | MH422962.1 | 2018 | Korea    |
| KF2                       | MH422963.1 | 2018 | Korea    |
| KF3                       | MH422964.1 | 2018 | Korea    |
| KF4                       | MH422965.1 | 2018 | Korea    |
| KF5                       | MH422966.1 | 2018 | Korea    |
| K63                       | MH422967.1 | 2018 | Korea    |
| LB4                       | MK092483.1 | 2018 | China    |
| BO.s17.6                  | MG991309.1 | 2018 | Polska   |
| KU.f12.1-5                | MG991310.1 | 2018 | Polska   |
| PB.f11.1-5                | MG991311.1 | 2018 | Polska   |
| WT.f11.6-10               | MG991312.1 | 2018 | Polska   |
| ZD.f9.1-5                 | MG991308.1 | 2018 | Polska   |
| AHbz                      | MK484100.1 | 2019 | China    |
| AHhf                      | MK484102.1 | 2019 | China    |
| AHmas                     | MK484101.1 | 2019 | China    |
| P1_OK/USA                 | MW051671.1 | 2020 | USA      |
| P2_OK/USA                 | MW051670.1 | 2020 | USA      |
| COL/Cundinamarca7.16/2015 | MT747168.1 | 2020 | Colombia |
